# Supplementary material for: Electronic spectroscopy of ethyl bromide probed by VUV photoabsorption and quantum chemical calculations
Source: Royal Society of Chemistry journal article supplement (doi:10.1039/c6cp07330a), 2017-01-01
Supplement: c6cp07330a1.pdf [file c6cp07330a1.pdf]

**Supplementary Table 1. Calculated and experimental bond lengths (Å) and bond angles (°) of ethyl bromide at the B3LYP/631+(2d,2p) level of theory**

| Parameter                 | Experimental |         |       | Theoretical             |                        |                                        |                         |
|---------------------------|--------------|---------|-------|-------------------------|------------------------|----------------------------------------|-------------------------|
|                           | Neutral      | Neutral | Ionic | 2A''(5s) <sub>1/2</sub> | 3A'(5s) <sub>1/2</sub> | 3A''(5pa <sub>1</sub> ) <sub>1/2</sub> | 5A'(5pe) <sub>1/2</sub> |
| r-CBr                     | 1.950        | 1.990   | 2.013 | 2.025                   | 2.062                  | 2.046                                  | 2.252                   |
| r-CC                      | 1.518        | 1.516   | 1.534 | 1.491                   | 1.504                  | 1.516                                  | 1.490                   |
| r-CH(CH <sub>3</sub> )    | 1.093        | 1.097   | 1.09  | 1.09                    | 1.12                   | 1.09                                   | 1.10                    |
| r-CH(CH <sub>2</sub> ,CH) | 1.087        | 1.088   | 1.09  | 1.10                    | 1.09                   | 1.10                                   | 1.09                    |
| ∠CCBr                     | 111.0        | 111.6   | 103.3 | 117.7                   | 112.1                  | 111.2                                  | 103.9                   |
| ∠HCH (CH <sub>3</sub> )   | 108.9        | 108.4   | 107.8 | 107.9                   | 107.8                  | 105.9                                  | 104.3                   |
| ∠HCH (CH <sub>2</sub> )   | 109.9        | 109.7   | 114.2 | 108.1                   | 113.5                  | 106.5                                  | 113.6                   |
| ∠HCBBr                    | 105.4        | 104.7   | 104.3 | 98.5                    | 100.2                  | 98.2                                   | 96.8                    |

**Supplementary Table 2. Vibrational frequencies (in cm<sup>-1</sup>) of ethyl bromide in a few excited states at the B3LYP/6-31+(2d,2p) level of theory**

| Vibrational Mode                                     | 2A''(5s) <sub>1/2</sub>          |                                  | 3A'(5s) <sub>1/2</sub>           |                                  | 3A''(5pa <sub>1</sub> ) <sub>1/2</sub> |                                  | 5A'(5pe) <sub>1/2</sub>          |                                  |
|------------------------------------------------------|----------------------------------|----------------------------------|----------------------------------|----------------------------------|----------------------------------------|----------------------------------|----------------------------------|----------------------------------|
|                                                      | C <sub>2</sub> H <sub>5</sub> Br | C <sub>2</sub> D <sub>5</sub> Br | C <sub>2</sub> H <sub>5</sub> Br | C <sub>2</sub> D <sub>5</sub> Br | C <sub>2</sub> H <sub>5</sub> Br       | C <sub>2</sub> D <sub>5</sub> Br | C <sub>2</sub> H <sub>5</sub> Br | C <sub>2</sub> D <sub>5</sub> Br |
| <b>A'</b>                                            |                                  |                                  |                                  |                                  |                                        |                                  |                                  |                                  |
| v <sub>1</sub> (CH <sub>3</sub> d-str)               | 3095                             | 2262                             | 3089                             | 2259                             | 3088                                   | 2282                             | 3031                             | 2225                             |
| v <sub>2</sub> (CH <sub>2</sub> s-str)               | 2918                             | 2122                             | 2993                             | 2174                             | 2980                                   | 2161                             | 3006                             | 2187                             |
| v <sub>3</sub> (CH <sub>3</sub> s-str)               | 2763                             | 2008                             | 2795                             | 2030                             | 2903                                   | 2100                             | 2906                             | 2098                             |
| v <sub>4</sub> (CH <sub>3</sub> d-deform)            | 1480                             | 1183                             | 1482                             | 1132                             | 1429                                   | 1105                             | 1471                             | 1153                             |
| v <sub>5</sub> (CH <sub>2</sub> scis)                | 1395                             | 1053                             | 1390                             | 1055                             | 1394                                   | 1031                             | 1418                             | 1065                             |
| v <sub>6</sub> (CH <sub>3</sub> s-deform)            | 1357                             | 1028                             | 1379                             | 1032                             | 1367                                   | 1018                             | 1289                             | 1028                             |
| v <sub>7</sub> (CH <sub>2</sub> wag)                 | 1234                             | 934                              | 1252                             | 949                              | 1213                                   | 941                              | 1190                             | 919                              |
| v <sub>8</sub> (CH <sub>3</sub> rock; in-plane)      | 1109                             | 887                              | 1045                             | 878                              | 987                                    | 815                              | 1036                             | 838                              |
| v <sub>9</sub> (CC str)                              | 901                              | 712                              | 885                              | 694                              | 870                                    | 699                              | 773                              | 587                              |
| v <sub>10</sub> (CBr str)                            | 435                              | 415                              | 418                              | 396                              | 397                                    | 370                              | 448                              | 414                              |
| v <sub>11</sub> (CCBr deform)                        | 270                              | 240                              | 199                              | 179                              | 245                                    | 221                              | 165                              | 148                              |
| <b>A''</b>                                           |                                  |                                  |                                  |                                  |                                        |                                  |                                  |                                  |
| v <sub>12</sub> (CH <sub>2</sub> a-str)              | 3151                             | 2337                             | 3164                             | 2365                             | 3088                                   | 2232                             | 3118                             | 2324                             |
| v <sub>13</sub> (CH <sub>3</sub> d-str)              | 2913                             | 2141                             | 3126                             | 2321                             | 2900                                   | 2160                             | 2916                             | 2168                             |
| v <sub>14</sub> (CH <sub>3</sub> d-deform)           | 1416                             | 1019                             | 1414                             | 1029                             | 1415                                   | 1024                             | 1227                             | 900                              |
| v <sub>15</sub> (CH <sub>2</sub> twist)              | 1230                             | 952                              | 1244                             | 977                              | 1078                                   | 830                              | 1115                             | 859                              |
| v <sub>16</sub> (CH <sub>3</sub> rock; out of plane) | 916                              | 662                              | 1155                             | 835                              | 871                                    | 626                              | 781                              | 562                              |
| v <sub>17</sub> (CH <sub>2</sub> rock)               | 482                              | 362                              | 806                              | 587                              | 607                                    | 457                              | 716                              | 527                              |
| v <sub>18</sub> (Torsion)                            | 213                              | 160                              | 254                              | 184                              | 230                                    | 167                              | 232                              | 166                              |
| ZPE (cm <sup>-1</sup> )                              | 13,639                           | 10,239                           | 14,045                           | 10,538                           | 13,531                                 | 10,120                           | 13,419                           | 10,084                           |

**Supplementary Table 3. Vertical Excited state energies at the CAM-B3LYP/aug-cc-pVTZ level of theory<sup>#</sup>**

| Sym              | VEE (eV)     | <i>f</i>      | Λ            | Transition       | Weight       | Ass.          | EXPT         | O-C          |
|------------------|--------------|---------------|--------------|------------------|--------------|---------------|--------------|--------------|
| <sup>3</sup> A'' | 6.181        | 0             | 0.276        | 7a''-21a'        | 0.53         |               |              |              |
| <sup>3</sup> A'  | 6.231        | 0             | 0.290        | 19a'-21a'        | -0.52        |               |              |              |
| <sup>1</sup> A'' | <b>6.126</b> | <b>0.0004</b> | <b>0.277</b> | <b>7a''-21a'</b> | <b>0.53</b>  | V             | ~5.2 – 6.7   |              |
| <sup>1</sup> A'  | <b>6.177</b> | <b>0.0005</b> | <b>0.290</b> | <b>19a'-21a'</b> | <b>0.52</b>  |               |              |              |
| <sup>3</sup> A'' | 7.067        | 0             | 0.248        | 7a''-20a'        | -0.77        | 5s-3/2        | 7.026        | -0.063       |
| <sup>3</sup> A'  | 7.111        | 0             | 0.254        | 19a'-20a'        | -0.75        |               |              |              |
| <sup>1</sup> A'' | <b>7.001</b> | <b>0.0433</b> | <b>0.249</b> | <b>7a''-20a'</b> | <b>0.76</b>  | <b>5s-1/2</b> | <b>7.348</b> | <b>0.319</b> |
| <sup>1</sup> A'  | <b>7.057</b> | <b>0.0562</b> | <b>0.255</b> | <b>19a'-20a'</b> | <b>-0.75</b> |               |              |              |
| <sup>3</sup> A'' | 7.840        | 0             | 0.273        | 7a''-21a'        | 0.75         |               |              |              |
| <sup>3</sup> A'  | 7.909        | 0             | 0.277        | 19a'-21a'        | -0.72        |               |              |              |
| <sup>1</sup> A'' | <b>7.807</b> | <b>0.0063</b> | <b>0.238</b> | <b>7a''-21a'</b> | <b>0.66</b>  | V?            | --           |              |
| <sup>1</sup> A'  | <b>7.866</b> | <b>0.0138</b> | <b>0.290</b> | <b>19a'-21a'</b> | <b>-0.75</b> |               |              |              |

|                  |               |               |              |                   |              |                              |               |               |
|------------------|---------------|---------------|--------------|-------------------|--------------|------------------------------|---------------|---------------|
| <sup>3</sup> A'  | 7.845         | 0             | 0.179        | 7a''-8a''         | 0.88         | 5pe-3/2                      | 7.969         | 0.111         |
| <sup>3</sup> A'' | 7.870         | 0             | 0.123        | 19a'-8a''         | -0.93        |                              |               |               |
| <sup>1</sup> A'  | <b>7.805</b>  | <b>0.0175</b> | <b>0.167</b> | <b>7a''-8a''</b>  | <b>-0.92</b> | <b>5pe-1/2</b>               | <b>8.296</b>  | <b>0.463</b>  |
| <sup>1</sup> A'' | <b>7.861</b>  | <b>0.0001</b> | <b>0.158</b> | <b>19a'-8a''</b>  | <b>0.82</b>  |                              |               |               |
| <sup>3</sup> A'' | 8.052         | 0             | 0.279        | 7a''-23a'         | -0.55        | 4da <sub>1</sub> -3/2        | 8.727         | 0.651         |
|                  |               |               |              | 7a''-22a'         | 0.52         | 5pa <sub>1</sub> -3/2        | 7.903         | -0.173        |
| <sup>3</sup> A'  | 8.101         | 0             | 0.289        | 19a'-23a'         | -0.56        |                              |               |               |
|                  |               |               |              | 19a'-22a'         | 0.53         |                              |               |               |
| <sup>1</sup> A'' | <b>8.022</b>  | <b>0.0288</b> | <b>0.277</b> | <b>7a''-23a'</b>  | <b>-0.53</b> | <b>4da<sub>1</sub>-1/2</b>   | <b>9.035</b>  | <b>0.992</b>  |
|                  |               |               |              | <b>7a''-22a'</b>  | <b>0.51</b>  | <b>5pa<sub>1</sub>-1/2</b>   | <b>8.236</b>  | <b>0.193</b>  |
| <sup>1</sup> A'  | <b>8.064</b>  | <b>0.0352</b> | <b>0.288</b> | <b>19a'-23a'</b>  | <b>-0.54</b> |                              |               |               |
|                  |               |               |              | <b>19a'-22a'</b>  | <b>0.52</b>  |                              |               |               |
| <sup>3</sup> A'  | 8.685         | 0             | 0.158        | 7a''-9a''         | -0.91        | 4de-3/2                      | 8.793         | 0.102         |
| <sup>3</sup> A'' | 8.696         | 0             | 0.192        | 19a'-9a''         | -0.71        |                              |               |               |
| <sup>1</sup> A'  | <b>8.652</b>  | <b>0.0021</b> | <b>0.167</b> | <b>7a''-9a''</b>  | <b>-0.88</b> | <b>4de-1/2</b>               | <b>9.094</b>  | <b>0.421</b>  |
| <sup>1</sup> A'' | <b>8.695</b>  | <b>0.0116</b> | <b>0.177</b> | <b>19a'-9a''</b>  | <b>-0.77</b> |                              |               |               |
| <sup>3</sup> A'' | 8.725         | 0             | 0.206        | 19a'-25a'         | 0.58         | 6pa <sub>1</sub> -3/2        | 9.133         | 0.359         |
| <sup>3</sup> A'  | 8.823         | 0             | 0.293        | 19a'-25a'         | 0.66         |                              |               |               |
| <sup>1</sup> A'' | <b>8.654</b>  | <b>0.0001</b> | <b>0.222</b> | <b>7a''-25a'</b>  | <b>0.67</b>  | <b>6pa<sub>1</sub>-1/2</b>   | <b>9.465</b>  | <b>0.747</b>  |
| <sup>1</sup> A'  | <b>8.783</b>  | <b>0.0224</b> | <b>0.306</b> | <b>19a'-25a'</b>  | <b>0.80</b>  |                              |               |               |
| <sup>3</sup> A'  | 8.827         | 0             | 0.311        | 18a'-20a'         | 0.67         |                              |               |               |
| <sup>1</sup> A'  | <b>8.771</b>  | <b>0.0721</b> | <b>0.292</b> | <b>18a'-20a'</b>  | <b>0.77</b>  | <b>5s(18a')</b>              | <b>9.281</b>  | <b>0.510</b>  |
| <sup>3</sup> A'' | 8.973         | 0             | 0.254        | 7a''-24a'         | 0.61         | 6s-3/2                       | 8.908         | -0.069        |
| <sup>3</sup> A'  | 8.982         | 0             | 0.263        | 19a'-24a'         | 0.72         |                              |               |               |
| <sup>1</sup> A'' | <b>8.938</b>  | <b>0.0135</b> | <b>0.254</b> | <b>7a''-24a'</b>  | <b>0.53</b>  | <b>6s-1/2</b>                | <b>9.215</b>  | <b>0.274</b>  |
| <sup>1</sup> A'  | <b>8.943</b>  | <b>0.0223</b> | <b>0.268</b> | <b>19a'-24a'</b>  | <b>-0.65</b> |                              |               |               |
| <sup>3</sup> A'' | 9.022         | 0             | 0.26         | 7a''-26a'         | -0.69        | 5da <sub>1</sub> -3/2        | 9.708         | 0.651         |
| <sup>3</sup> A'  | 9.092         | 0             | 0.281        | 19a'-26a'         | -0.67        |                              |               |               |
| <sup>1</sup> A'' | <b>8.988</b>  | <b>0.0001</b> | <b>0.259</b> | <b>7a''-26a'</b>  | <b>-0.62</b> | <b>5da<sub>1</sub>-1/2</b>   | <b>9.405</b>  | <b>0.399</b>  |
| <sup>1</sup> A'  | <b>9.024</b>  | <b>0.0155</b> | <b>0.278</b> | <b>19a'-26a'</b>  | <b>0.63</b>  |                              |               |               |
| <sup>3</sup> A'' | 9.140         | 0             | 0.18         | 19a'-10a''        | 0.95         | 6pe-3/2                      | 9.163         | -0.062        |
| <sup>3</sup> A'  | 9.310         | 0             | 0.305        | 7a''-10a''        | -0.62        |                              |               |               |
| <sup>1</sup> A'' | <b>9.104</b>  | <b>0.0015</b> | <b>0.180</b> | <b>19a'-10a''</b> | <b>-0.94</b> | <b>6pe-1/2</b>               | <b>9.518</b>  | <b>0.368</b>  |
| <sup>1</sup> A'  | <b>9.196</b>  | <b>0.2500</b> | <b>0.293</b> | <b>7a''-10a''</b> | <b>0.69</b>  |                              |               |               |
| <sup>3</sup> A'' | 9.268         | 0             | 0.261        | 6a''-20a'         | 0.70         |                              |               |               |
| <sup>1</sup> A'' | <b>9.223</b>  | <b>0.0000</b> | <b>0.262</b> | <b>6a''-20a'</b>  | <b>0.71</b>  | <b>5s(6a'')</b>              | <b>9.948</b>  | <b>0.725</b>  |
| <sup>3</sup> A'  | 9.430         | 0             | 0.315        | 18a'-21a'         | 0.50         |                              |               |               |
| <sup>1</sup> A'  | <b>9.364</b>  | <b>0.1091</b> | <b>0.324</b> | <b>18a'-21a'</b>  | <b>0.55</b>  | V?                           | --            |               |
| <sup>3</sup> A'' | 9.532         | 0             | 0.252        | 7a''-28a'         | 0.64         | 7pa <sub>1</sub> -3/2        | 9.626         | 0.060         |
| <sup>3</sup> A'  | 9.601         | 0             | 0.283        | 19a'-28a'         | 0.61         |                              |               |               |
| <sup>1</sup> A'' | <b>9.502</b>  | <b>0.0131</b> | <b>0.252</b> | <b>7a''-28a'</b>  | <b>0.63</b>  | <b>7pa<sub>1</sub>-1/2</b>   | <b>9.908</b>  | <b>0.383</b>  |
| <sup>1</sup> A'  | <b>9.548</b>  | <b>0.0279</b> | <b>0.282</b> | <b>19a'-28a'</b>  | <b>-0.59</b> |                              |               |               |
| <sup>3</sup> A'' | 9.748         | 0             | 0.241        | 6a''-20a'         | 0.52         |                              |               |               |
|                  |               |               |              | <b>6a''-21a'</b>  | <b>0.51</b>  |                              |               |               |
| <sup>1</sup> A'' | <b>9.709</b>  | <b>0.0064</b> | <b>0.252</b> | <b>6a''-21a'</b>  | <b>-0.57</b> | V?                           | --            |               |
|                  |               |               |              | <b>6a''-20a'</b>  | <b>-0.53</b> |                              |               |               |
| <sup>3</sup> A'  | 9.756         | 0             | 0.349        | 18a'-22a'         | 0.69         |                              |               |               |
| <sup>1</sup> A'  | <b>9.720</b>  | <b>0.0275</b> | <b>0.346</b> | <b>18a'-22a'</b>  | <b>-0.71</b> | <b>5pa<sub>1</sub>(18a')</b> | <b>10.236</b> | <b>0.516</b>  |
| <sup>3</sup> A'' | 9.806         | 0             | 0.168        | 18a'-8a''         | -0.86        |                              |               |               |
| <sup>1</sup> A'' | <b>9.779</b>  | <b>0.0168</b> | <b>0.160</b> | <b>18a'-8a''</b>  | <b>-0.89</b> | <b>5pe(18a')</b>             | <b>10.259</b> | <b>0.480</b>  |
| <sup>3</sup> A'' | 9.830         | 0             | 0.226        | 7a''-27a'         | -0.63        | 7s-3/2                       | 9.465         | -0.385        |
| <sup>3</sup> A'  | 9.869         | 0             | 0.277        | 19a'-27a'         | -0.57        |                              |               |               |
| <sup>1</sup> A'' | <b>9.805</b>  | <b>0.0052</b> | <b>0.224</b> | <b>7a''-27a'</b>  | <b>-0.62</b> | <b>7s-1/2</b>                | <b>9.776</b>  | <b>-0.041</b> |
| <sup>1</sup> A'  | <b>9.829</b>  | <b>0.0197</b> | <b>0.285</b> | <b>19a'-27a'</b>  | <b>0.53</b>  |                              |               |               |
| <sup>3</sup> A'  | 9.972         | 0             | 0.355        | 18a'-23a'         | -0.69        |                              |               |               |
| <sup>1</sup> A'  | <b>9.934</b>  | <b>0.0233</b> | <b>0.352</b> | <b>18a'-23a'</b>  | <b>-0.68</b> | <b>4da<sub>1</sub>(18a')</b> | <b>10.623</b> | <b>0.689</b>  |
| <sup>3</sup> A'  | 10.078        | 0             | 0.26         | 7a''-11a''        | 0.59         | 5de-3/2                      | 9.435         | -0.661        |
| <sup>3</sup> A'' | 10.114        | 0             | 0.183        | 19a'-11a''        | -0.74        |                              |               |               |
| <sup>1</sup> A'  | <b>10.040</b> | <b>0.0125</b> | <b>0.264</b> | <b>7a''-11a''</b> | <b>-0.51</b> | <b>5de-1/2</b>               | <b>9.73</b>   | <b>-0.344</b> |
| <sup>1</sup> A'' | <b>10.107</b> | <b>0.0015</b> | <b>0.189</b> | <b>19a'-11a''</b> | <b>0.69</b>  |                              |               |               |
| <sup>3</sup> A'' | 10.106        | 0             | 0.223        | 7a''-30a'         | 0.68         | 8s-3/2                       | 9.76          | -0.391        |
| <sup>3</sup> A'  | 10.195        | 0             | 0.287        | 19a'-30a'         | -0.66        |                              |               |               |
| <sup>1</sup> A'' | <b>10.075</b> | <b>0.0194</b> | <b>0.217</b> | <b>7a''-30a'</b>  | <b>0.64</b>  | <b>8s-1/2</b>                | <b>10.064</b> | <b>-0.045</b> |
| <sup>1</sup> A'  | <b>10.143</b> | <b>0.0556</b> | <b>0.285</b> | <b>19a'-30a'</b>  | <b>0.65</b>  |                              |               |               |
| <sup>3</sup> A'  | 10.132        | 0             | 0.278        | 7a''-12a''        | -0.40        |                              |               |               |

|                  |               |               |              |                   |               |                              |               |               |
|------------------|---------------|---------------|--------------|-------------------|---------------|------------------------------|---------------|---------------|
| <sup>1</sup> A'  | <b>10.098</b> | <b>0.0181</b> | <b>0.275</b> | <b>7a''-12a''</b> | <b>0.46</b>   | --                           |               |               |
| <sup>3</sup> A'' | 10.246        | 0             | 0.226        | 7a''-29a'         | -0.74         | 6da <sub>1</sub> -3/2        | 9.73          | -0.541        |
| <sup>3</sup> A'  | 10.295        | 0             | 0.273        | 19a'-29a'         | -0.79         |                              |               |               |
| <sup>1</sup> A'' | <b>10.226</b> | <b>0.0072</b> | <b>0.226</b> | <b>7a''-29a'</b>  | <b>0.72</b>   | <b>6da<sub>1</sub>-1/2</b>   | <b>10.04</b>  | <b>-0.203</b> |
| <sup>1</sup> A'  | <b>10.260</b> | <b>0.0070</b> | <b>0.273</b> | <b>19a'-29a'</b>  | <b>0.79</b>   |                              |               |               |
| <sup>3</sup> A'' | 10.314        | 0             | 0.199        | 19a'-12a''        | 0.67          | 7pe-3/2                      | 9.654         | -0.714        |
| <sup>3</sup> A'  | 10.422        | 0             | 0.231        | 7a''-12a''        | 0.67          |                              |               |               |
| <sup>1</sup> A'' | <b>10.290</b> | <b>0.0020</b> | <b>0.206</b> | <b>19a'-12a''</b> | <b>-0.62</b>  | <b>7pe-1/2</b>               | <b>9.948</b>  | <b>-0.380</b> |
| <sup>1</sup> A'  | <b>10.365</b> | <b>0.1296</b> | <b>0.234</b> | <b>7a''-12a''</b> | <b>0.66</b>   |                              |               |               |
| <sup>3</sup> A'' | 10.361        | 0             | 0.244        | 6a''-21a'         | 0.61          |                              |               |               |
| <sup>1</sup> A'' | <b>10.311</b> | <b>0.0487</b> | <b>0.239</b> | <b>6a''-21a'</b>  | <b>0.55</b>   | V                            | --            |               |
| <sup>3</sup> A'  | 10.497        | 0             | 0.224        | 6a''-8a''         | -0.80         |                              |               |               |
| <sup>1</sup> A'  | <b>10.443</b> | <b>0.0887</b> | <b>0.225</b> | <b>6a''-8a''</b>  | <b>0.79</b>   | <b>5pe(6a'')</b>             | <b>11.049</b> | <b>0.606</b>  |
| <sup>3</sup> A'' | 10.582        | 0             | 0.237        | 6a''-22a'         | 0.67          |                              |               |               |
| <sup>1</sup> A'' | <b>10.554</b> | <b>0.0013</b> | <b>0.236</b> | <b>6a''-22a'</b>  | <b>0.66</b>   | <b>5pa<sub>1</sub>(6a'')</b> | <b>10.993</b> | <b>0.439</b>  |
| <sup>3</sup> A'  | 10.615        | 0             | 0.275        | 17a'-20a'         | -0.73         |                              |               |               |
| <sup>1</sup> A'  | <b>10.589</b> | <b>0.0023</b> | <b>0.276</b> | <b>17a'-20a'</b>  | <b>-0.73</b>  | <b>5s(17a')</b>              | --            |               |
| <sup>3</sup> A'' | 10.647        | 0             | 0.136        | 18a'-9a''         | -0.95         |                              |               |               |
| <sup>1</sup> A'' | <b>10.629</b> | <b>0.0022</b> | <b>0.142</b> | <b>18a'-9a''</b>  | <b>-0.93</b>  | <b>4de(18a')</b>             | --            |               |
| <sup>3</sup> A'' | 10.741        | 0             | 0.269        | 19a'-13a''        | 0.66          |                              |               |               |
|                  |               |               |              | 19a'-14a''        | 0.44          | --                           | --            |               |
| <sup>1</sup> A'' | <b>10.692</b> | <b>0.0088</b> | <b>0.268</b> | <b>19a'-13a''</b> | <b>-0.64</b>  |                              |               |               |
|                  |               |               |              | <b>19a'-14a''</b> | <b>-0.44</b>  |                              |               |               |
| <sup>3</sup> A'  | 10.756        | 0             | 0.34         | 18a'-25a'         | 0.64          |                              |               |               |
|                  |               |               |              | 7a''-13a''        | -0.39         | --                           | --            |               |
| <sup>3</sup> A'  | 10.822        | 0             | 0.302        | 19a'-31a'         | -0.54         |                              |               |               |
|                  |               |               |              | 7a''-13a''        | -0.42         |                              |               |               |
| <sup>1</sup> A'  | <b>10.710</b> | <b>0.0218</b> | <b>0.336</b> | <b>7a''-13a''</b> | <b>0.51</b>   |                              |               |               |
|                  |               |               |              | <b>18a'-32a'</b>  | <b>-0.51</b>  | --                           | --            |               |
| <sup>1</sup> A'  | <b>10.773</b> | <b>0.0147</b> | <b>0.319</b> | <b>18a'-24a'</b>  | <b>0.52</b>   |                              |               |               |
|                  |               |               |              | <b>18a'-25a'</b>  | <b>-0.49</b>  |                              |               |               |
| <sup>3</sup> A'' | 10.867        | 0             | 0.233        | 7a''-31a'         | -0.82         | 8pa <sub>1</sub> -3/2        | 9.828         | -1.057        |
| <sup>3</sup> A'  | 10.903        | 0             | 0.284        | 19a'-31a'         | 0.65          |                              |               |               |
| <sup>1</sup> A'' | <b>10.849</b> | <b>0.0052</b> | <b>0.233</b> | <b>7a''-31a'</b>  | <b>-0.83</b>  | <b>8pa<sub>1</sub>-1/2</b>   | <b>10.134</b> | <b>-0.726</b> |
| <sup>1</sup> A'  | <b>10.872</b> | <b>0.0630</b> | <b>0.272</b> | <b>19a'-31a'</b>  | <b>0.73</b>   |                              |               |               |
| <sup>3</sup> A'  | 11.048        | 0             | 0.318        | 18a'-26a'         | 0.6286        |                              |               |               |
| <sup>1</sup> A'  | <b>11.003</b> | <b>0.0068</b> | <b>0.318</b> | <b>18a'-26a'</b>  | <b>0.622</b>  | <b>5da<sub>1</sub>(18a')</b> | --            |               |
| <sup>3</sup> A'  | 11.167        | 0             | 0.293        | 19a'-32a'         | 0.678         | --                           | --            |               |
| <sup>1</sup> A'  | <b>11.125</b> | <b>0.0142</b> | <b>0.294</b> | <b>19a'-32a'</b>  | <b>0.6577</b> |                              |               |               |
| <sup>3</sup> A'' | 11.185        | 0             | 0.175        | 18a'-10a''        | -0.757        |                              |               |               |
| <sup>1</sup> A'' | <b>11.154</b> | <b>0.0013</b> | <b>0.18</b>  | <b>18a'-10a''</b> | <b>-0.74</b>  | <b>6pe(18a')</b>             | --            |               |
| <sup>3</sup> A'' | 11.257        | 0             | 0.272        | 7a''-32a'         | 0.8675        | 7da <sub>1</sub> -3/2        | 9.908         | -1.328        |
| <sup>1</sup> A'' | <b>11.214</b> | <b>0.0195</b> | <b>0.267</b> | <b>7a''-32a'</b>  | <b>0.8461</b> |                              |               |               |
| <sup>3</sup> A'  | 11.251        | 0             | 0.287        | 19a'-32a'         | -0.489        | 7da <sub>1</sub> -1/2        | 10.215        | -1.018        |
| <sup>1</sup> A'  | <b>11.215</b> | <b>0.0995</b> | <b>0.286</b> | <b>19a'-32a'</b>  | <b>-0.534</b> |                              |               |               |

#Singlet state energies are in bold type; all energies in eV; Unassigned lines are either not observed in the present experiment or show too much orbital mixing to be unambiguously assigned. EXPT: present experimental study; VEE: vertical excited energy; *f*: oscillator strength;  $\Lambda$ : lambda diagnostic value; Ass: assignment; R: Rydberg; V: Valence

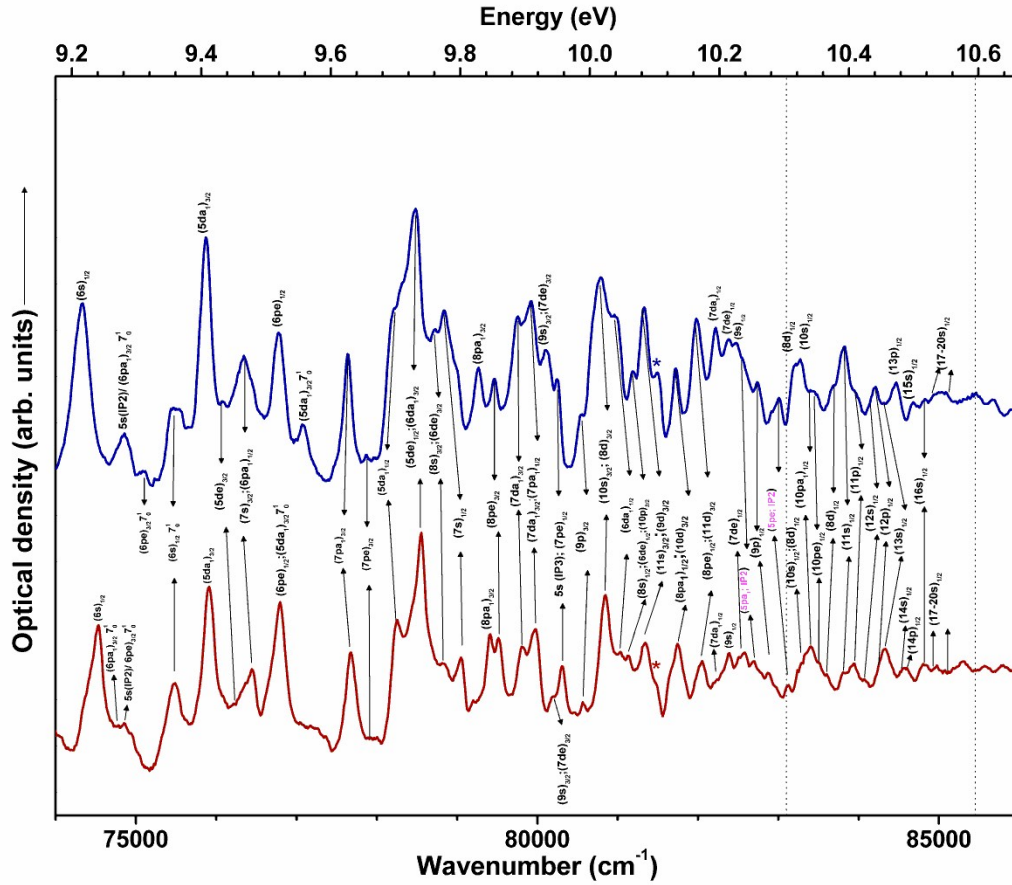

Supplementary Figure 1: Expanded view of the 74,000–86000 cm<sup>-1</sup> region

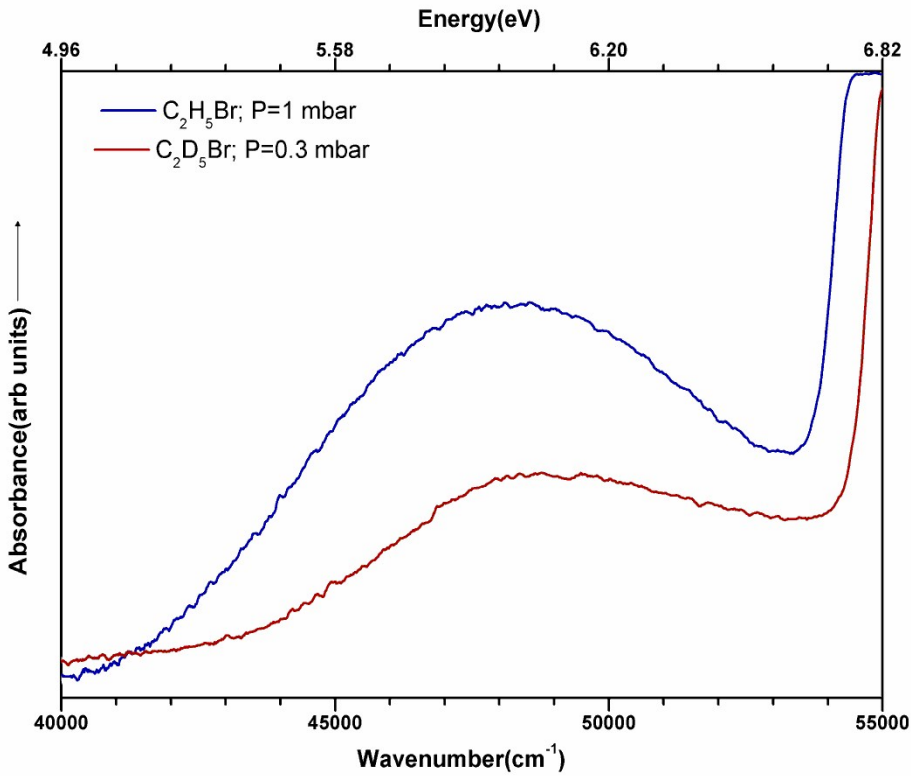

## Supplementary Figure 2: Absorption spectra of C<sub>2</sub>H<sub>5</sub>Br and C<sub>2</sub>D<sub>5</sub>Br in the UV region

### Appendix 1: Note on spectroscopic notations

We recapitulate here the various spectroscopic notations that have been used to describe the Rydberg spectra of alkyl bromides. The similarity in the structure and spectra of HBr, CH<sub>3</sub>Br and CH<sub>3</sub>CH<sub>2</sub>Br leads one naturally to consider the C<sub>∞v</sub> or C<sub>3v</sub> limiting cases and then follow what happens when the symmetry is lowered to C<sub>s</sub>. The other important consideration is the correlation of the relatively weaker spin orbit coupling in the neutral molecule with the strong spin orbit coupling seen in the cationic ground state. We also note that the concept of double groups has to be used in derivation of the possible Rydberg states in order to allow for the half integral values of spin<sup>1, 2</sup>. In correlating the C<sub>3v</sub> case with the linear limit C<sub>∞v</sub>, we note that a<sub>1</sub> and e symmetries correspond to σ and π respectively<sup>3, 4</sup>. In the linear molecule limit, the first *ns* Rydberg excitation may be taken as π<sup>4</sup>→π<sup>3</sup>σ, giving rise to four states, three of Π symmetry (dipole allowed) and one of Δ symmetry (dipole forbidden). In the C<sub>3v</sub> limit, this correlates with three states of E symmetry and one each of A<sub>1</sub> and A<sub>2</sub> symmetry (jointly referred to as state 3). In the intermediate or strong spin-orbit coupling limit, only two of the four states, viz. 2 and 4 are strongly allowed<sup>2, 4</sup>. Of these, the <sup>3</sup>Π<sub>1</sub> correlates with the <sup>2</sup>E<sub>3/2</sub> component of the cationic ground state while <sup>1</sup>Π<sub>1</sub> correlates with the <sup>2</sup>E<sub>1/2</sub> component. In the C<sub>s</sub> case, strictly speaking all transitions are allowed, however transitions observed experimentally follow the C<sub>3v</sub> case, thus validating the assumption that the additional methyl group has negligible influence on the Rydberg spectra of ethyl bromide. The expected states for *np* and *nd* Rydberg excitations can also be worked out in a similar way.

| State | C <sub>∞v</sub> <sup>4</sup>                                    | C <sub>3v</sub> <sup>2</sup>        | C <sub>s</sub> <sup>2</sup> | Ionic limit                   | Current designation                  |
|-------|-----------------------------------------------------------------|-------------------------------------|-----------------------------|-------------------------------|--------------------------------------|
| 1     | <sup>3</sup> Π <sub>2</sub> (Δ)                                 | E(2)                                | (A', A'')                   | <sup>2</sup> E <sub>3/2</sub> | --                                   |
| 2     | <sup>3</sup> Π <sub>1</sub> (Π)                                 | E(1)                                | (A', A'')                   | <sup>2</sup> E <sub>3/2</sub> | 5s ( <sup>2</sup> E <sub>3/2</sub> ) |
| 3*    | <sup>3</sup> Π <sub>0±</sub> (Σ <sup>+</sup> , Σ <sup>-</sup> ) | A <sub>1</sub> , A <sub>2</sub> (0) | (A', A'')                   | <sup>2</sup> E <sub>1/2</sub> | --                                   |
| 4     | <sup>1</sup> Π <sub>1</sub>                                     | E(1)                                | (A', A'')                   | <sup>2</sup> E <sub>1/2</sub> | 5s ( <sup>2</sup> E <sub>1/2</sub> ) |

\*These two states are very close in energy and have been designated jointly as state 3<sup>2, 4</sup>.

### References

1. G. Herzberg, *Molecular Spectra and Molecular Structure Vol. III Electronic Spectra and Electronic Structure of Polyatomic Molecules*, D.VAN NOSTRAND COMPANY, INC., Princeton, New Jersey, 1966.
2. N. L. Baker and B. R. Russell, *Journal of Molecular Spectroscopy*, 1978, 69, 211-224.
3. R. S. Mulliken, *Physical Review*, 1942, 61, 277-283.

4. S. Felps, P. Hochmann, P. Brint and S. P. McGlynn, *Journal of Molecular Spectroscopy*, 1976, 59, 355-379.
